# Supplementary material
Source: PubMed Central journal article supplement (PMC5180462)
Supplement: DC161376SupplementaryData.pdf [file DC161376SupplementaryData.pdf]

SUPPLEMENTARY DATA

**Supplementary Figure 1. Effect of RYGB and LAGB on glucose and insulin concentrations, insulin secretion rate (ISR) during OGTT and iso-IVGC and incretin effect of insulin. A-B:** Glucose concentrations during OGTT and Iso-IVGC in RYGB and LAGB. Due to the rapid drop in glucose levels in the second part of the OGTT after RYGB, glucose levels could not be matched during the iso-IVGC. **C and D:** Insulin concentrations during OGTT and IV-isoGC and incretin effect (%) (insert) before and 1 year after surgery. **E:** ISR during OGTT and IV-isoGC before and 1 year after RYGB. Circles: RYGB, Squares: LAGB; open symbols: pre-surgery; dark symbols: 1 year post SURGERY; n=12 FOR LAGB and n=27 for RYGB. Mean±SEM for each group. \*p<0.05 vs. Pre-Intervention, # p<0.05 vs. LAGB.

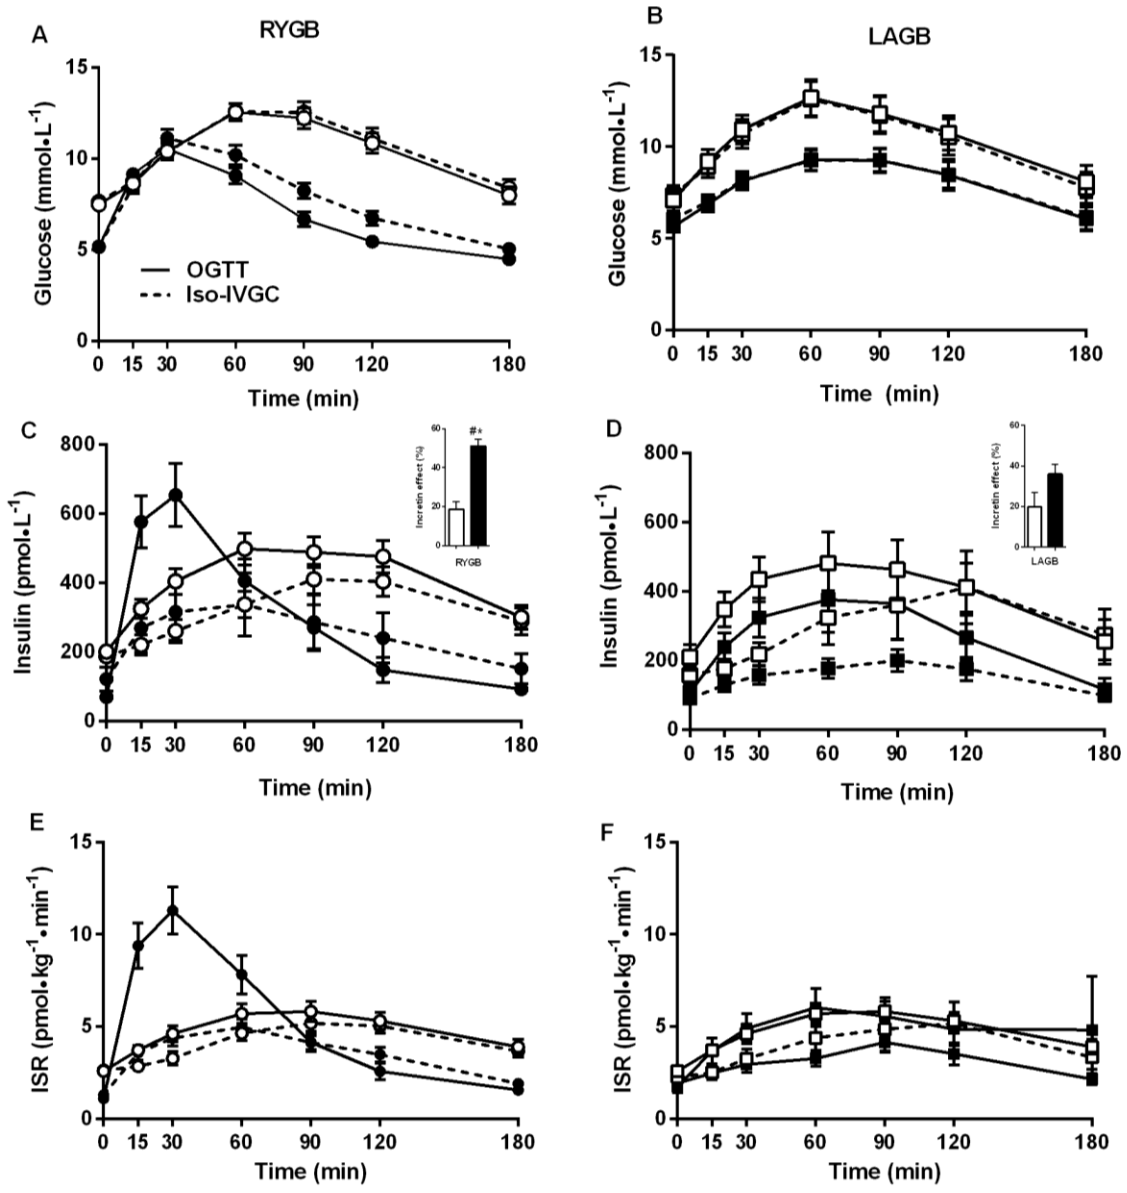

SUPPLEMENTARY DATA

**Supplementary Figure 2. Effect of RYGB and LAGB on GLP-1 and GIP concentrations during the OGTT before and 1 year after surgery. Inserts: Effect of RYGB and LAGB on peak GLP-1 and GIP concentrations during the OGTT.**

Circles: RYGB, Squares: LAGB; open symbols: pre-surgery; dark symbols: 1 year post SURGERY; n=12 FOR LAGB and n=27 for RYGB. Mean±SEM for each group. \*p<0.05 vs. Pre-Intervention, # p<0.05 vs. LAGB.

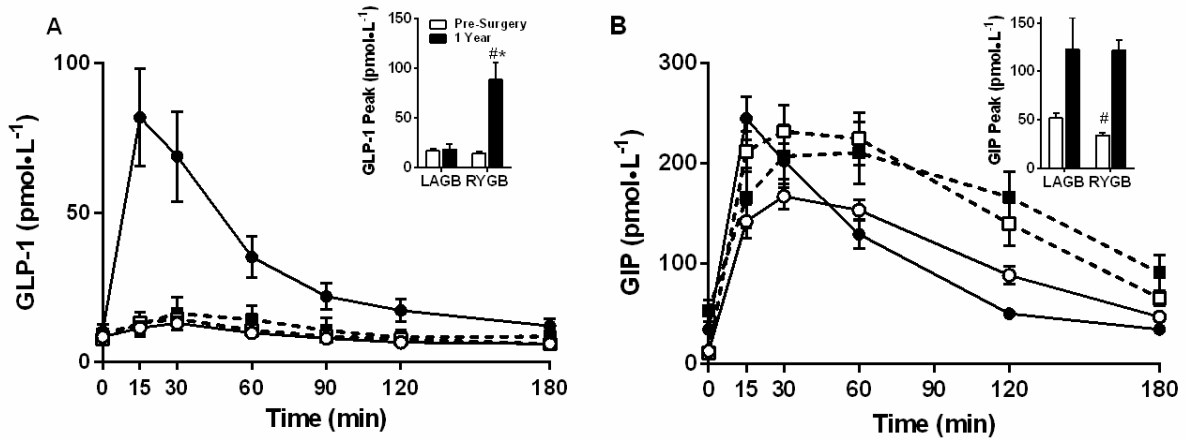

SUPPLEMENTARY DATA

**Supplementary Figure 3. A- Effect of RYGB or LAGB on  $\beta$ -cell glucose sensitivity (BCGS) in response to oral and IV isoglycemic stimuli.** Open bars: pre-surgery; hatched bars: 10% matched weight loss after either LAGB or RYGB; black bars 1 year post surgery. Mean $\pm$ SEM for each group. \* $p$ <0.05 vs. pre-intervention; # $p$ <0.05 vs. LAGB.

**B- Relationship between O-BCGS and 2 hour post-prandial glucose.** Each symbol represents the mean $\pm$ SEM for each group. Circles: RYGB, Squares: LAGB; open symbols: pre-surgery (LAGB, n=15; RYGB, n=27); ‘target’ symbols: 10% matched weight loss (LAGB, n=15; RYGB, n=26); grey symbols: 20% matched weight loss (n=8 for LAGB and RYGB); dark symbols: 1 year post LAGB (n=12) or RYGB (n=27).

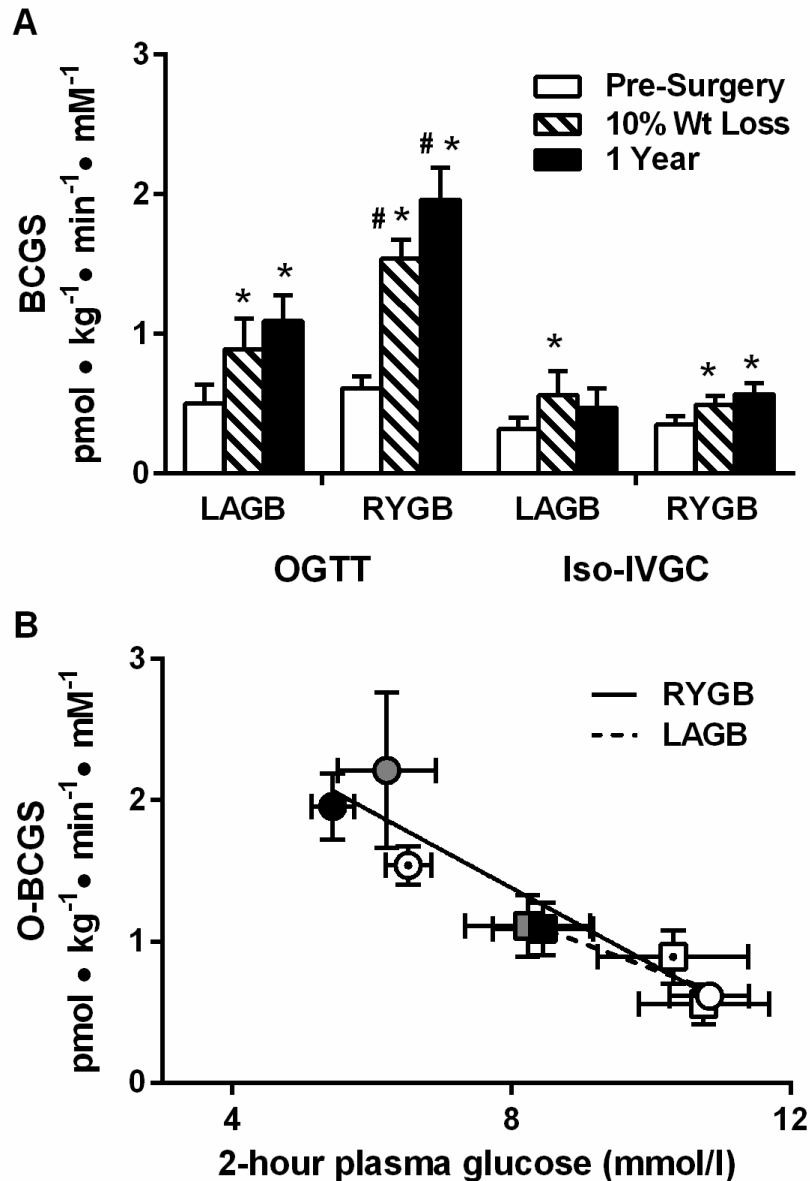

## SUPPLEMENTARY DATA

**Supplementary Table 1.** List of abbreviations and definitions used throughout manuscript.

| <b>Abbreviations List</b>         |                                                    |
|-----------------------------------|----------------------------------------------------|
| <b>RYGB</b>                       | Roux-en Y gastric bypass                           |
| <b>LAGB</b>                       | laparoscopic adjustable gastric banding            |
| <b>OGTT</b>                       | oral glucose tolerance test                        |
| <b>Iso-IVGC</b>                   | IV-isoglycemic glucose clamp                       |
| <b>IVGTT</b>                      | IV glucose tolerance test                          |
| <b>GLP-1</b>                      | glucagon-like peptide 1                            |
| <b>GIP</b>                        | gastric inhibitory polypeptide                     |
| <b>DPP-IV</b>                     | dipeptidyl peptidase IV                            |
| <b>IV-[variable]</b>              | Variables derived from Iso-IVCG                    |
| <b>O-[variable]</b>               | Variables derived from OGTT                        |
| <b>AUC<sub>0-180</sub></b>        | area under the curve from 0 – 180 minutes          |
| <b>AUC<sub>0-60</sub></b>         | area under the curve from 0 – 60 minutes           |
| <b>HOMA-IR</b>                    | Homeostasis model assessment of insulin resistance |
| <b>ISI</b>                        | insulin sensitivity index or Matsuda index         |
| <b>AIRg</b>                       | acute insulin secretion                            |
| <b>Sg</b>                         | glucose-dependent glucose disappearance            |
| <b>Si</b>                         | insulin sensitivity                                |
| <b>DI<sub>O</sub> (HOMA-IR)</b>   | oral disposition index calculated with HOMA-IR     |
| <b>DI<sub>O</sub> (ISI)</b>       | oral disposition index calculated with ISI         |
| <b>DI<sub>IV</sub> (IVGTT)</b>    | IV disposition index in response to IVGTT          |
| <b>DI<sub>IV</sub> (iso-IVGC)</b> | IV disposition index in response to iso-IVGC       |
| <b>BCGS</b>                       | beta cell glucose sensitivity                      |
| <b>ISR</b>                        | insulin secretion rate                             |

SUPPLEMENTARY DATA

**Supplementary Table 2. Metabolic and hormonal changes 1 year after LAGB and RYGB.** Mean  $\pm$ SD.  $\Delta$ : change after each intervention. Reported p value is for difference between change with LAGB and with RYGB: \*p<0.05 vs. pre-intervention; †p<0.05 vs. IV; #p<0.05 diff between LAGB and RYGB; n=27 and LAGB n=12 except for body composition and IVGTT ( RYGB=13, LAGB=7).

|                                                      | LAGB (n=12)       |                   |                   | RYGB (n=27)        |                    |                    | p     |
|------------------------------------------------------|-------------------|-------------------|-------------------|--------------------|--------------------|--------------------|-------|
|                                                      | Pre-Surgery       | 1 Year Post       | $\Delta$          | Pre-Surgery        | 1 Year Post        | $\Delta$           |       |
| Age (years)                                          | 48.5 $\pm$ 10.2   |                   |                   | 43.7 $\pm$ 8.2     |                    |                    |       |
| DM duration (months)                                 | 35.7 $\pm$ 36.7   |                   |                   | 29.6 $\pm$ 27.2    |                    |                    |       |
| Oral DM medication (# subjects)                      | 8/12              | 1/12              |                   | 20/26              | 1/26               |                    |       |
| Insulin (# subjects)                                 | 0/12              | 0/12              |                   | 2/26               | 0/26               |                    |       |
| HbA1c (%)                                            | 6.5 $\pm$ 0.9     | 5.8 $\pm$ 0.7     | 0.8 $\pm$ 1.0     | 6.8 $\pm$ 0.7      | 5.5 $\pm$ 0.5*     | 1.2 $\pm$ 1.0*     | 0.379 |
| Weight (kg)                                          | 116.7 $\pm$ 11.1  | 97.3 $\pm$ 15.6   | 19.3 $\pm$ 12.5*  | 120.2 $\pm$ 15.3   | 84.1 $\pm$ 13.9#   | 36.1 $\pm$ 9.2*    | 0.001 |
| Fasting insulin (pmol·L <sup>-1</sup> )              | 207.1 $\pm$ 129.2 | 107.3 $\pm$ 73.9  | 99.4 $\pm$ 99.8*  | 204.3 $\pm$ 76.6   | 60.8 $\pm$ 33.3    | 140.2 $\pm$ 76.4*  | 0.227 |
| Fasting GLP-1 ( pmol·L <sup>-1</sup> )               | 7.5 $\pm$ 3.7     | 9.4 $\pm$ 11.4    | 2.1 $\pm$ 9.3     | 8.3 $\pm$ 7.6      | 10.2 $\pm$ 8.1     | 0.03 $\pm$ 11.4    | 0.557 |
| Fasting GIP ( pmol·L <sup>-1</sup> )                 | 11.0 $\pm$ 5.1    | 23.4 $\pm$ 10.8   | 12.4 $\pm$ 5.4*   | 9.4 $\pm$ 4.2      | 16.8 $\pm$ 10.8    | 7.4 $\pm$ 6.3      | 0.717 |
| GLP-1 peak ( pmol·L <sup>-1</sup> )                  | 17.1 $\pm$ 8.3    | 18.6 $\pm$ 19.3   | 2.4 $\pm$ 17.0    | 14.5 $\pm$ 11.0    | 88.2 $\pm$ 72.7#   | 50.0 $\pm$ 74.7*   | 0.005 |
| GLP-1 AUC (pmol·L <sup>-1</sup> ·min <sup>-1</sup> ) | 9.3 $\pm$ 4.7     | 11.0 $\pm$ 13.2   | 1.9 $\pm$ 3.2     | 8.5 $\pm$ 6.4      | 31.3 $\pm$ 22.9#   | 14.9 $\pm$ 4.9*    | 0.033 |
| GIP peak ( pmol·L <sup>-1</sup> )                    | 51.6 $\pm$ 17.5   | 122.7 $\pm$ 88.3  | 71.1 $\pm$ 91.3   | 33.8 $\pm$ 12.2#   | 121.7 $\pm$ 87.2   | 87.9 $\pm$ 43.9*   | 0.132 |
| GIP AUC (pmol·L <sup>-1</sup> ·min <sup>-1</sup> )   | 32.6 $\pm$ 13.1   | 32.5 $\pm$ 22.2   | 0.1 $\pm$ 5.6     | 20.8 $\pm$ 9.1#    | 25.2 $\pm$ 28.7    | 4.4 $\pm$ 2.6      | 0.131 |
| % C-peptide Incretin Effect                          | 14.8 $\pm$ 38.2   | 33.1 $\pm$ 23.7   | 18.5 $\pm$ 38.8   | 11.0 $\pm$ 18.0    | 30.1 $\pm$ 16.1    | 16.5 $\pm$ 17.8*   | 0.866 |
| DI <sub>O (ISI)</sub>                                | 228.0 $\pm$ 334.3 | 379.7 $\pm$ 246.7 | 151.7 $\pm$ 248.1 | 160.5 $\pm$ 102.9  | 617.8 $\pm$ 388.1# | 452.8 $\pm$ 410.4* | 0.009 |
| Fat Mass (%)                                         | 49.9 $\pm$ 8.5    | 42.9 $\pm$ 7.5    | 7.0 $\pm$ 4.9*    | 46.3 $\pm$ 6.0     | 39.3 $\pm$ 7.1     | 7.8 $\pm$ 8.5*     | 0.796 |
| Fat Mass (kg)                                        | 57.1 $\pm$ 11.7   | 42.1 $\pm$ 11.6   | 14.5 $\pm$ 8.0*   | 56.1 $\pm$ 8.2     | 32.8 $\pm$ 7.5     | 22.7 $\pm$ 10.0*   | 0.057 |
| Waist Circumference (mm)                             | 957.0 $\pm$ 137.4 | 825.6 $\pm$ 105.2 | 76.2 $\pm$ 98.8*  | 1060.0 $\pm$ 113.3 | 856.5 $\pm$ 101.7  | 197.3 $\pm$ 90.8*  | 0.039 |

SUPPLEMENTARY DATA

**Supplementary Table 3. Comparison of RYGB and LAGB at 10% matched weight loss.** Mean  $\pm$ SD.  $\Delta$  change with intervention, p value reported is for difference between change with LAGB and with RYGB: \*p<0.05 vs. pre-intervention; †p<0.05 vs. IV; #p<0.05 vs. LAGB.

|                                                      | LAGB (n=15)       |                   |                   | RYGB (n=26)      |                    |                    | p      |
|------------------------------------------------------|-------------------|-------------------|-------------------|------------------|--------------------|--------------------|--------|
|                                                      | Pre-LAGB          | 10% Wt Loss       | $\Delta$          | Pre-RYGB         | 10% Wt Loss        | $\Delta$           |        |
| Age (years)                                          | 50.5 $\pm$ 10.2   | -                 | -                 | 43.0 $\pm$ 8.9#  | -                  | -                  | -      |
| DM duration (months)                                 | 50.7 $\pm$ 52.7   | -                 | -                 | 27.6 $\pm$ 29.2  | -                  | -                  | -      |
| Oral DM medication use (# subjects)                  | 8/15              | -                 | -                 | 14/26            | -                  | -                  | -      |
| Insulin (# subjects)                                 | 0/15              | -                 | -                 | 2/26             | -                  | -                  | -      |
| HbA1c (%)                                            | 6.7 $\pm$ 1.0     | -                 | -                 | 6.8 $\pm$ 0.7    | -                  | -                  | -      |
| Weight (kg)                                          | 112.7 $\pm$ 14.7  | 102.0 $\pm$ 14.5  | 10.7 $\pm$ 2.2*   | 119.6 $\pm$ 15.7 | 107.9 $\pm$ 15.5   | 11.8 $\pm$ 2.1*    | 0.148  |
| Fasting insulin (pmol·L <sup>-1</sup> )              | 199.7 $\pm$ 112.1 | 143.7 $\pm$ 79.0  | 41.9 $\pm$ 137.6* | 204.5 $\pm$ 75.6 | 116.9 $\pm$ 62.5   | 87.6 $\pm$ 94.3*   | 0.267  |
| Fasting GLP-1 (pmol·L <sup>-1</sup> )                | 9.4 $\pm$ 6.3     | 7.2 $\pm$ 4.5     | 2.2 $\pm$ 5.4     | 8.2 $\pm$ 7.1    | 7.9 $\pm$ 8.4      | 0.3 $\pm$ 3.5      | 0.242  |
| Fasting GIP (pmol·L <sup>-1</sup> )                  | 11.2 $\pm$ 4.9    | 10.7 $\pm$ 6.2    | 0.4 $\pm$ 3.0     | 10.1 $\pm$ 4.6   | 8.7 $\pm$ 3.2      | 2.0 $\pm$ 5.4      | 0.226  |
| GLP-1 peak (pmol·L <sup>-1</sup> )                   | 18.0 $\pm$ 8.2    | 14.4 $\pm$ 5.5    | 3.5 $\pm$ 7.2*    | 14.3 $\pm$ 10.0  | 56.9 $\pm$ 40.8#   | 42.6 $\pm$ 33.2*   | <0.001 |
| GLP-1 AUC (pmol·L <sup>-1</sup> ·min <sup>-1</sup> ) | 9.8 $\pm$ 5.7     | 8.2 $\pm$ 1.0     | 1.4 $\pm$ 2.2     | 8.6 $\pm$ 6.0    | 25.7 $\pm$ 21.7#   | 17.1 $\pm$ 16.5*   | <0.001 |
| GIP peak (pmol·L <sup>-1</sup> )                     | 50.9 $\pm$ 17.0   | 44.3 $\pm$ 15.9   | 5.7 $\pm$ 13.1    | 35.7 $\pm$ 13.9# | 54.5 $\pm$ 21.2    | 18.8 $\pm$ 16.8*   | <0.001 |
| GIP AUC (pmol·L <sup>-1</sup> ·min <sup>-1</sup> )   | 32.2 $\pm$ 11.8   | 30.8 $\pm$ 3.4    | 1.4 $\pm$ 9.0     | 21.7 $\pm$ 8.15# | 27.6 $\pm$ 11.9    | 5.1 $\pm$ 8.4*     | 0.063  |
| % C-peptide Incretin Effect                          | 10.0 $\pm$ 19.3   | 8.5 $\pm$ 34.4    | 1.5 $\pm$ 58.5    | 10.9 $\pm$ 18.3  | 29.5 $\pm$ 15.1#   | 18.8 $\pm$ 21.3*   | 0.329  |
| DI <sub>O</sub> (ISI)                                | 190.9 $\pm$ 306.3 | 282.1 $\pm$ 403.0 | 91.3 $\pm$ 267.0  | 152.7 $\pm$ 97.6 | 425.1 $\pm$ 269.1# | 272.4 $\pm$ 283.3* | 0.009  |

SUPPLEMENTARY DATA

**Supplementary Table 4. Comparison of LAGB and RYGB at 10% and 20% matched weight loss.** Mean  $\pm$ SD. Reported p value is for the overall effect of each surgical intervention; \*p<0.05 vs. pre-intervention; †p<0.05 vs. IV; § p<0.05 vs. 10% weight loss; #p<0.05 vs. LAGB.

|                                                                        | LAGB (n=8)         |                    |                    | p      | RYGB (n=8)         |                      |                       | p      |
|------------------------------------------------------------------------|--------------------|--------------------|--------------------|--------|--------------------|----------------------|-----------------------|--------|
|                                                                        | Pre-LAGB           | 10% Wt Loss        | 20% Wt Loss        |        | Pre-RYGB           | 10% Wt Loss          | 20% Wt Loss           |        |
| Age (years)                                                            | 46.8 $\pm$ 9.5     |                    |                    |        | 47.8 $\pm$ 9.1     |                      |                       |        |
| DM duration (months)                                                   | 35.3 $\pm$ 39.8    |                    |                    |        | 34.0 $\pm$ 22.7    |                      |                       |        |
| Oral DM medication (# subjects)                                        | 5/8                | 1/8                | 2/8                |        | 5/8                | 0/8                  | 0/8                   |        |
| Insulin (# subjects)                                                   | 0/8                | 0/8                | 0/8                |        | 0/8                | 0/8                  | 0/8                   |        |
| HbA1c (%)                                                              | 6.8 $\pm$ 1.0      |                    | 5.8 $\pm$ 0.8      |        | 7.0 $\pm$ 0.5      | -                    | 5.4 $\pm$ 0.7*        |        |
| Weight (kg)                                                            | 116.4 $\pm$ 9.3    | 104.9 $\pm$ 3.1*   | 88.6 $\pm$ 8.2*§   | <0.001 | 117.4 $\pm$ 14.7   | 107.4 $\pm$ 4.8*     | 92.0 $\pm$ 12.3*      | 0.017  |
| BMI (kg·m <sup>-2</sup> )                                              | 43.4 $\pm$ 5.2     | 38.8 $\pm$ 1.6*    | 32.8 $\pm$ 3.3*§   | 0.001  | 43.7 $\pm$ 4.1     | 40.0 $\pm$ 1.4*      | 34.4 $\pm$ 3.8*§      | <0.001 |
| Weight loss (%)                                                        |                    | 9.9 $\pm$ 0.8      | 23.6 $\pm$ 7.6§    | 0.002  |                    | 8.5 $\pm$ 1.9        | 21.8 $\pm$ 1.8§       | 0.048  |
| Weight loss duration (weeks)                                           |                    | 4.9 $\pm$ 3.5      | 62.7 $\pm$ 28.2§   | 0.001  |                    | 3.8 $\pm$ 1.1        | 43.5 $\pm$ 30.2§      | 0.008  |
| Glucose infused (Iso-IVGC) (g)                                         | 45.1 $\pm$ 24.3    | 44.3 $\pm$ 5.6     | 28.0 $\pm$ 7.9§    | 0.034  | 50.5 $\pm$ 15.7    | 40.0 $\pm$ 8.2       | 34.7 $\pm$ 9.6*       | 0.034  |
| Fasting glucose (mmol·L <sup>-1</sup> )                                | 8.3 $\pm$ 1.8      | 6.3 $\pm$ 0.4*     | 6.0 $\pm$ 1.3*     | 0.017  | 7.9 $\pm$ 1.9      | 6.6 $\pm$ 0.3*       | 5.4 $\pm$ 0.4*§       | 0.037  |
| Fasting insulin (pmol·L <sup>-1</sup> )                                | 230.7 $\pm$ 140.7  | 148.4 $\pm$ 31.9   | 95.5 $\pm$ 43.9    | 0.171  | 153.1 $\pm$ 41.3   | 131.3 $\pm$ 17.5     | 67.8 $\pm$ 19.0*§     | 0.011  |
| Fasting GLP-1 (pmol·L <sup>-1</sup> )                                  | 8.7 $\pm$ 3.9      | 8.8 $\pm$ 5.2      | 7.9 $\pm$ 3.8      | 0.878  | 6.0 $\pm$ 4.1      | 6.6 $\pm$ 1.1        | 6.8 $\pm$ 5.5         | 0.982  |
| Fasting GIP (pmol·L <sup>-1</sup> )                                    | 10.6 $\pm$ 5.7     | 11.7 $\pm$ 1.8     | 11.0 $\pm$ 3.9     | 0.960  | 4.3 $\pm$ 2.7#     | 6.8 $\pm$ 0.7#       | 4.8 $\pm$ 2.5§#       | 0.030  |
| 120' glucose (mmol·L <sup>-1</sup> )                                   | 11.2 $\pm$ 3.7     | 10.8 $\pm$ 1.4     | 8.2 $\pm$ 2.5§     | 0.163  | 11.7 $\pm$ 2.1     | 7.3 $\pm$ 0.7##*     | 6.2 $\pm$ 2.0*        | <0.001 |
| Glucose AUC (mmol·L <sup>-1</sup> ·min <sup>-1</sup> )                 | 11.3 $\pm$ 3.2     | 10.0 $\pm$ 1.0     | 8.0 $\pm$ 1.9*§    | 0.121  | 11.3 $\pm$ 1.9     | 8.6 $\pm$ 0.6##*     | 7.6 $\pm$ 1.5*        | 0.001  |
| GLP-1 peak (pmol·L <sup>-1</sup> )                                     | 17.9 $\pm$ 9.8     | 14.7 $\pm$ 1.9     | 14.7 $\pm$ 7.9     | 0.418  | 13.4 $\pm$ 4.0     | 98.0 $\pm$ 21.2##*   | 112.1 $\pm$ 69.1##*   | 0.005  |
| GLP-1 AUC (pmol·L <sup>-1</sup> ·min <sup>-1</sup> )                   | 10.7 $\pm$ 5.3     | 9.7 $\pm$ 1.4      | 8.3 $\pm$ 4.0      | 0.364  | 6.3 $\pm$ 2.0      | 26.4 $\pm$ 3.5##*    | 23.5 $\pm$ 17.1##*    | 0.001  |
| GIP peak (pmol·L <sup>-1</sup> )                                       | 55.6 $\pm$ 19.0    | 48.4 $\pm$ 3.9     | 55.1 $\pm$ 10.8    | 0.486  | 38.3 $\pm$ 14.2    | 58.3 $\pm$ 8.7*      | 41.3 $\pm$ 18.4       | 0.090  |
| GIP AUC (pmol·L <sup>-1</sup> ·min <sup>-1</sup> )                     | 36.1 $\pm$ 13.8    | 34.2 $\pm$ 8.4     | 38.1 $\pm$ 4.6     | 0.117  | 55.4 $\pm$ 101.4   | 24.3 $\pm$ 1.2#      | 16.2 $\pm$ 4.7#       | 0.124  |
| O-ISRAUC <sub>0-180</sub> (pmol·kg <sup>-1</sup> ·min <sup>-1</sup> )  | 880.6 $\pm$ 418.2  | 902.0 $\pm$ 127.3† | 751.2 $\pm$ 361.4† | 0.754  | 939.9 $\pm$ 398.0  | 1103.6 $\pm$ 176.0†  | 1137.2 $\pm$ 508.0†   | 0.176  |
| O-ISRAUC <sub>0-60</sub> (pmol·kg <sup>-1</sup> ·min <sup>-1</sup> )   | 287.0 $\pm$ 149.8† | 273.6 $\pm$ 39.1†  | 272.0 $\pm$ 140.4† | 0.906  | 275.5 $\pm$ 104.6† | 484.0 $\pm$ 68.3†##* | 616.1 $\pm$ 321.1†##* | 0.010  |
| IV-ISRAUC <sub>0-180</sub> (pmol·kg <sup>-1</sup> ·min <sup>-1</sup> ) | 719.6 $\pm$ 592.1  | 737.0 $\pm$ 110.7  | 521.9 $\pm$ 231.0  | 0.363  | 800.0 $\pm$ 317.7  | 698.7 $\pm$ 83.0     | 782.1 $\pm$ 345.7     | 0.363  |
| IV-ISR AUC <sub>0-60</sub> (pmol·kg <sup>-1</sup> ·min <sup>-1</sup> ) | 182.6 $\pm$ 124.1  | 198.2 $\pm$ 35.0   | 165.0 $\pm$ 78.8   | 0.495  | 195.8 $\pm$ 83.7   | 210.3 $\pm$ 26.1     | 245.8 $\pm$ 102.4     | 0.758  |
| HOMA-IR                                                                | 12.5 $\pm$ 8.3     | 5.9 $\pm$ 1.3*     | 3.0 $\pm$ 5.2*     | 0.096  | 8.2 $\pm$ 4.4      | 5.2 $\pm$ 2.2*       | 2.3 $\pm$ 0.7*§       | 0.036  |
| ISI                                                                    | 2.1 $\pm$ 1.6      | 3.1 $\pm$ 0.6*     | 5.8 $\pm$ 3.6*     | 0.037  | 2.1 $\pm$ 0.5      | 2.6 $\pm$ 0.4        | 4.6 $\pm$ 1.6*§       | 0.001  |
| O-BCGS (pmol·kg <sup>-1</sup> ·min <sup>-1</sup> ·mM)                  | 0.71 $\pm$ 0.54    | 0.81 $\pm$ 0.15†   | 1.10 $\pm$ 0.62†   | 0.164  | 0.52 $\pm$ 0.36†   | 1.57 $\pm$ 0.35†*    | 2.21 $\pm$ 1.56†*     | 0.001  |
| IV-BCGS (pmol·kg <sup>-1</sup> ·min <sup>-1</sup> ·mM)                 | 0.31 $\pm$ 0.19    | 0.48 $\pm$ 0.07*   | 0.66 $\pm$ 0.55    | 0.012  | 0.33 $\pm$ 0.26    | 0.38 $\pm$ 0.11      | 0.39 $\pm$ 0.25       | 0.873  |
| DI <sub>IV</sub> (iso-IVGC)                                            | 3.5 $\pm$ 7.7      | 5.7 $\pm$ 5.5      | 7.0 $\pm$ 26.8     | 0.345  | 1.2 $\pm$ 2.4      | 3.8 $\pm$ 3.1        | 6.0 $\pm$ 3.2         | 0.025  |
| DI <sub>O</sub> (HOMA-IR)                                              | 14.2 $\pm$ 27.6    | 19.8 $\pm$ 7.7     | 30.2 $\pm$ 24.7    | 0.398  | 11.8 $\pm$ 8.6     | 28.4 $\pm$ 7.1*      | 47.7 $\pm$ 30.1*      | 0.022  |

SUPPLEMENTARY DATA

|                                      |             |             |             |       |             |             |             |       |
|--------------------------------------|-------------|-------------|-------------|-------|-------------|-------------|-------------|-------|
| <b>DI<sub>O</sub> (ISI)</b>          | 192.7±347.8 | 215.3±169.9 | 376.8±269.5 | 0.245 | 166.7±107.0 | 315.4±175.3 | 525.4±359.9 | 0.041 |
| <b>Insulin Incretin Effect (%)</b>   | 26.9±26.9   | 39.5±5.2    | 30.8±12.9   | 0.376 | 17.4±20.0   | 46.6±5.0*   | 44.3±15.9#* | 0.012 |
| <b>C-peptide Incretin Effect (%)</b> | 23.5±30.6   | 20.8±5.5    | 19.7±24.4   | 0.962 | 12.5±15.1   | 34.8±6.3*   | 30.9±11.3*  | 0.037 |



SUPPLEMENTARY DATA

**Supplementary Table 5. Predictive value of surgery type and weight loss on outcomes at 1 year**

Results of Multivariate Mixed Model Regression Analysis testing the predictive value of surgery type (RYGB or LAGB) and weight loss % for the following outcome measured 1 year after surgery: glucose, insulin sensitivity, incretin effect, GLP-1 release and insulin secretion.

|                                                | <b>Surgery</b> | <b>Weight Loss (%)</b> |
|------------------------------------------------|----------------|------------------------|
|                                                | <b>p</b>       | <b>p</b>               |
| <b>Fasting Glucose (mmol/L)</b>                | 0.043          | <0.001                 |
| <b>120' Glucose (mmol/L)</b>                   | <0.001         | <0.001                 |
| <b>Glucose AUC (mmol/L/min)</b>                | 0.005          | <0.001                 |
| <b>HOMA-IR</b>                                 | 0.069          | <0.001                 |
| <b>ISI</b>                                     | 0.765          | <0.001                 |
| <b>Insulin Incretin Effect (%)</b>             | <0.001         | 0.762                  |
| <b>C-peptide Incretin Effect (%)</b>           | 0.033          | 0.734                  |
| <b>GLP-1 Peak (pmol/L)</b>                     | <0.001         | 0.174                  |
| <b>GLP-1 AUC (pmol/L/min)</b>                  | <0.001         | 0.351                  |
| <b>O-BCGS (pmol/kg/min/mM)</b>                 | 0.018          | 0.007                  |
| <b>DI<sub>IV</sub> (iso-IVGC)</b>              | 0.372          | 0.083                  |
| <b>DI<sub>O</sub> (HOMA-IR)</b>                | 0.024          | <0.001                 |
| <b>Insulin AUC<sub>0-60</sub> (pmol/L/min)</b> | 0.089          | <0.001                 |
